# Supplementary material for: Linkage between Leaf–Litter–Soil, Microbial Resource Limitation, and Carbon-Use Efficiency in Successive Chinese Fir (Cunninghamia lanceolata) Plantations
Source: MDPI journal article supplement (doi:10.3390/f14020357), 2023-02-10
Supplement: s1 [file s1]

## Supplementary material

**Table S1.** Results of the permutation test of the redundancy analysis (RDA), estimating potential significant relationships between microbial community composition, leaf, litter and soil properties.

The results are based on 999 permutations.

|                        |            | PLFA             |                |
|------------------------|------------|------------------|----------------|
| Environment parameters | Explains % | Pseudo- <i>F</i> | <i>P</i> value |
| Leaf and litter        |            |                  |                |
| LTN                    | 51.9       | 7.5              | 0.006**        |
| LOC                    | 42.4       | 44.4             | 0.004**        |
| MOC                    | 1.3        | 1.5              | 0.29           |
| LTP                    | 0.9        | 1.1              | 0.368          |
| MTN:MTP                | 1.7        | 2.9              | 0.126          |
| LOC: LTP               | 1.0        | 2.7              | 0.17           |
| MOC:MTP                | 0.4        | 1.5              | 0.428          |
| Soil                   |            |                  |                |
| TDN:SAP                | 56.5       | 9.1              | 0.002**        |
| DOC:TDN                | 39.3       | 57.4             | 0.002**        |
| DOC:SAP                | 2.3        | 6.3              | 0.02*          |
| N:P imbalance(L)       | 1.0        | 5.5              | 0.028*         |
| STN:STP                | 0.5        | 4.6              | 0.04*          |
| N:P imbalance(T)       | 0.3        | 6.8              | 0.11           |
| C:N imbalance(L)       | <0.1       | 1.1              | 0.514          |

**Table S2.** Results of the permutation test of the redundancy analysis (RDA), estimating potential significant relationships between soil extracellular enzyme, leaf, litter and soil properties. The results are based on 999 permutations.

| Environment parameters | Explains % | Enzyme activity  |                |
|------------------------|------------|------------------|----------------|
|                        |            | Pseudo- <i>F</i> | <i>P</i> value |
| Leaf and litter        |            |                  |                |
| MTN                    | 43.5       | 5.4              | 0.002**        |
| LOC:LTN                | 22.5       | 4.0              | 0.044*         |
| LTN:LTP                | 12.6       | 2.9              | 0.05*          |
| LOC: LTP               | 4.6        | 1.1              | 0.396          |
| MOC:MTN                | 5.0        | 1.3              | 0.352          |
| MOC                    | 3.1        | 0.7              | 0.534          |
| Soil                   |            |                  |                |
| N:P imbalance(T)       | 42.4       | 5.2              | 0.008**        |
| STP                    | 25.3       | 4.7              | 0.016*         |
| STN:STP                | 9.0        | 1.9              | 0.126          |
| SAP                    | 5.8        | 1.3              | 0.318          |
| DOC:SAP                | 3.9        | 0.9              | 0.498          |
| C:N imbalance(T)       | 5.0        | 1.2              | 0.396          |
| DOC:TDN                | 6.6        | 3.4              | 0.262          |

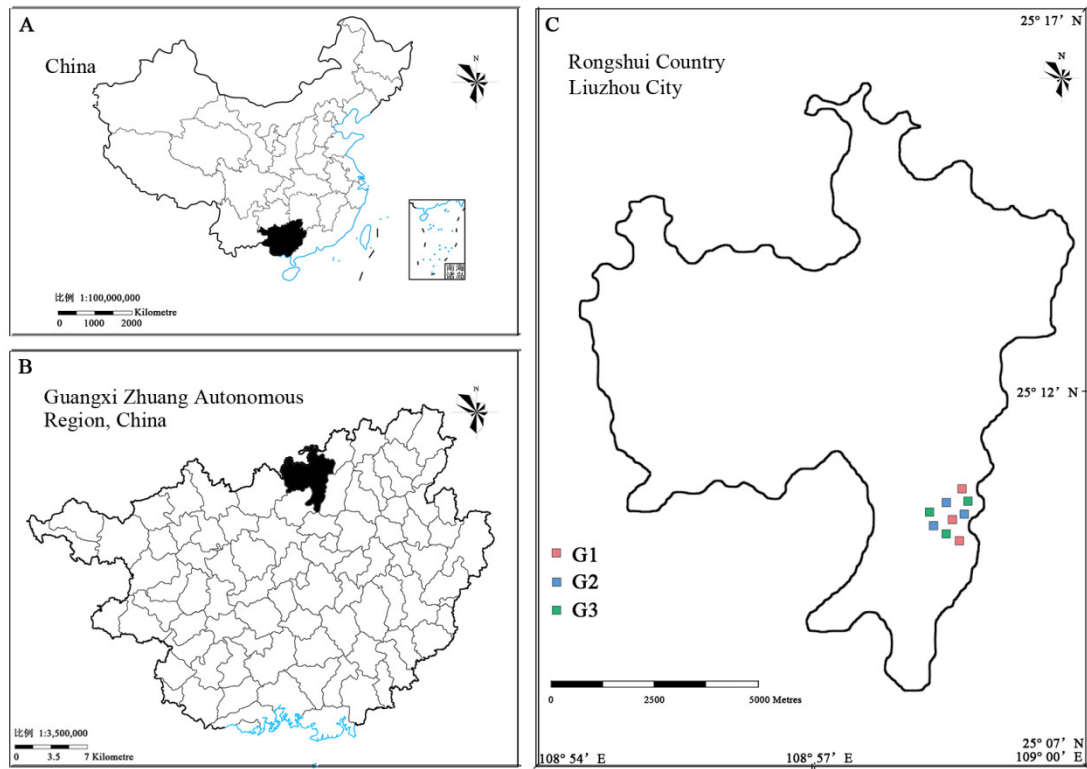

**Figure S1.** Research area. G1, The first-generation Chinese fir plantations; G2, The second-generation Chinese fir plantations; G3, The third-generation Chinese fir plantations.

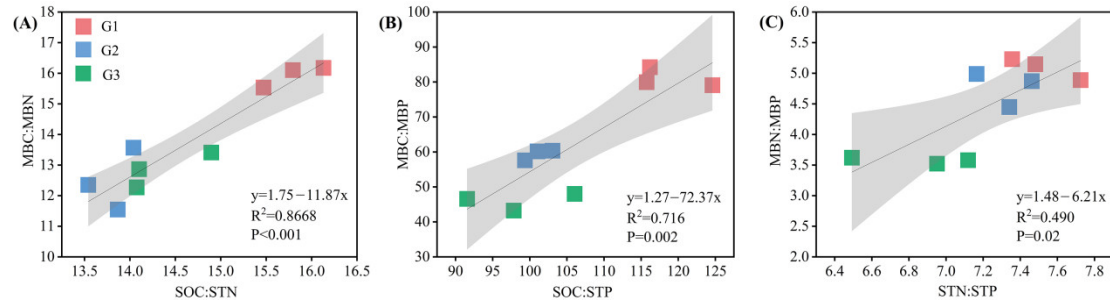

**Figure S2.** Relationships between the stoichiometry of soil organic carbon, nitrogen, and phosphorus (SOC:STN, SOC:STP, STN:STP) and microbial biomass (MBC:MBN, MBC:MBP, MBN:MBP).

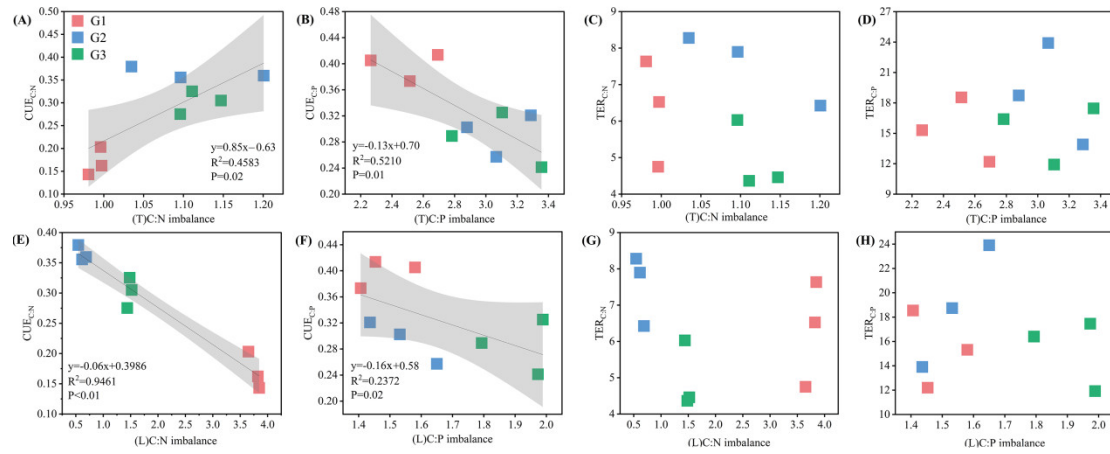

**Figure S3.** Carbon-use efficiency  $CUE_{C:N}$  and  $CUE_{C:P}$ , Threshold Elemental Ratio  $TER_{C:N}$  and  $TER_{C:P}$  and their relations to the C:N imbalance and C:P imbalance for the total resource pool (A-D) and labile resource pool (E-H).

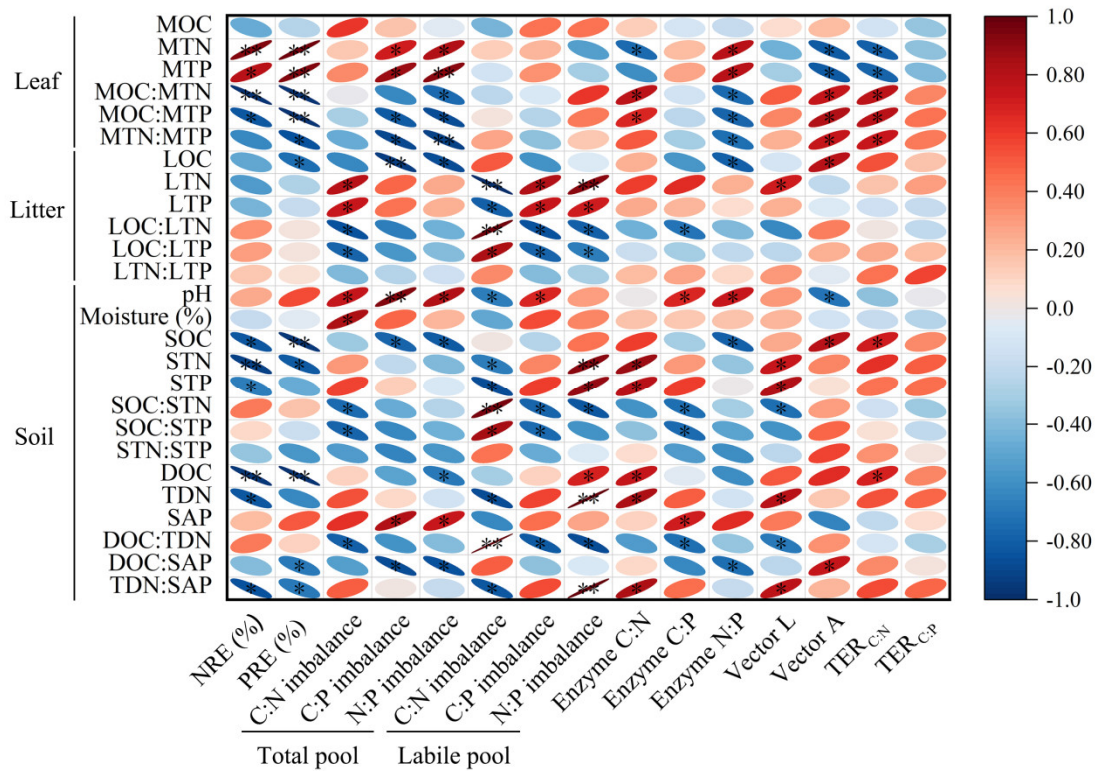

**Figure S4.** The N and P resorption efficiency, the stoichiometric imbalance, indicators of microbial resource limitation in relation to leaf, litter and soil properties. MOC, mature leaf organic carbon; MTN, mature leaf total nitrogen; MTP, mature leaf total phosphorus; LOC, litter organic carbon; LTN, litter total nitrogen; LTP, litter total phosphorus SOC, soil organic carbon; STN, soil total nitrogen; STP, soil total phosphorus; DOC, dissolved organic carbon; TDN, total dissolved nitrogen; SAP, soil available phosphorus; NRE, leaf N resorption efficiency (%); PRE, leaf P resorption efficiency (%). The stars indicate significant correlations between each other. Significant level: \*,  $P < 0.05$ ; \*\*,  $P < 0.01$ .
